# Supplementary material for: Shifts in honeybee foraging reveal historical changes in floral resources
Source: PubMed Central journal article supplement (PMC7809426; doi:10.1038/s42003-020-01562-4), 2021-01-14
Supplement: 42003_2020_1562_MOESM2_ESM.pdf [file 42003_2020_1562_MOESM2_ESM.pdf]

## **Shifts in honeybee foraging reveal historical changes in floral resources**

Laura Jones<sup>1,2</sup>, Georgina L. Brennan<sup>3</sup>, Abigail Lowe<sup>1,2</sup>, Simon Creer<sup>2</sup>, Col R. Ford<sup>1</sup>,  
and Natasha de Vere<sup>\*1,4</sup>.

1. National Botanic Garden of Wales, Llanarthne, SA32 8HG, UK

2. MEFGL, School of Natural Sciences, Bangor University, Bangor, LL57 2UW, UK

3. Centre for Environmental and Climate Research / Aquatic Ecology, Lund  
University, 223 62 Lund, Sweden

4. IBERS, Aberystwyth University, Aberystwyth, SY23 3FL, UK

### **Supplementary Information**

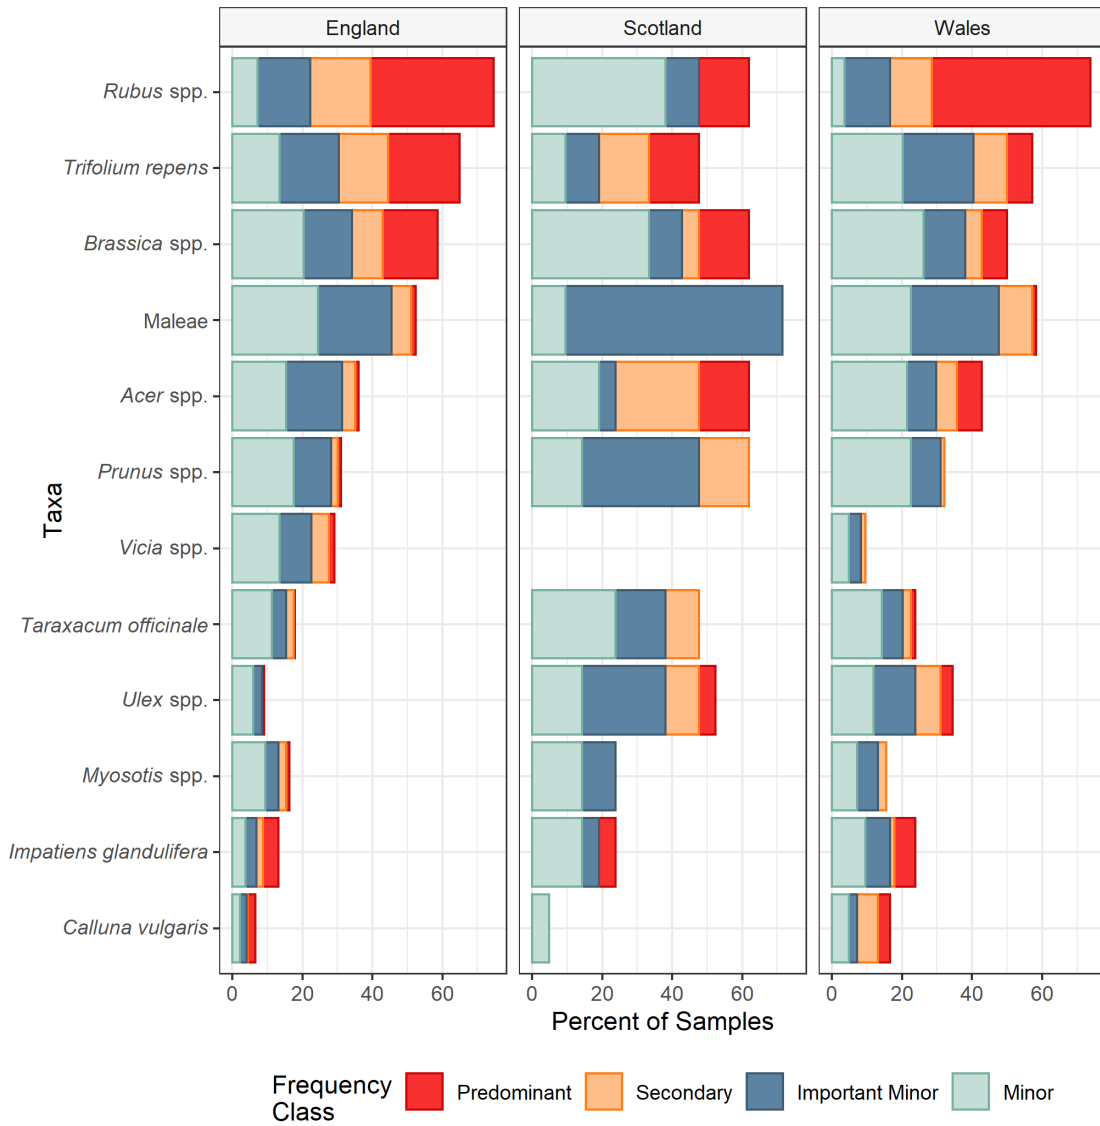

**Supplementary Figure 1:** Top predominant and secondary taxa (>15% sequences) found in the DNA in the different regions, England (n = 319), Scotland (n = 21), and Wales (n = 84). Regions with smaller samples sizes were excluded: Ireland (n = 3), Northern Ireland (n = 4), Guernsey (n = 3), and the Isle of Man (n = 7).

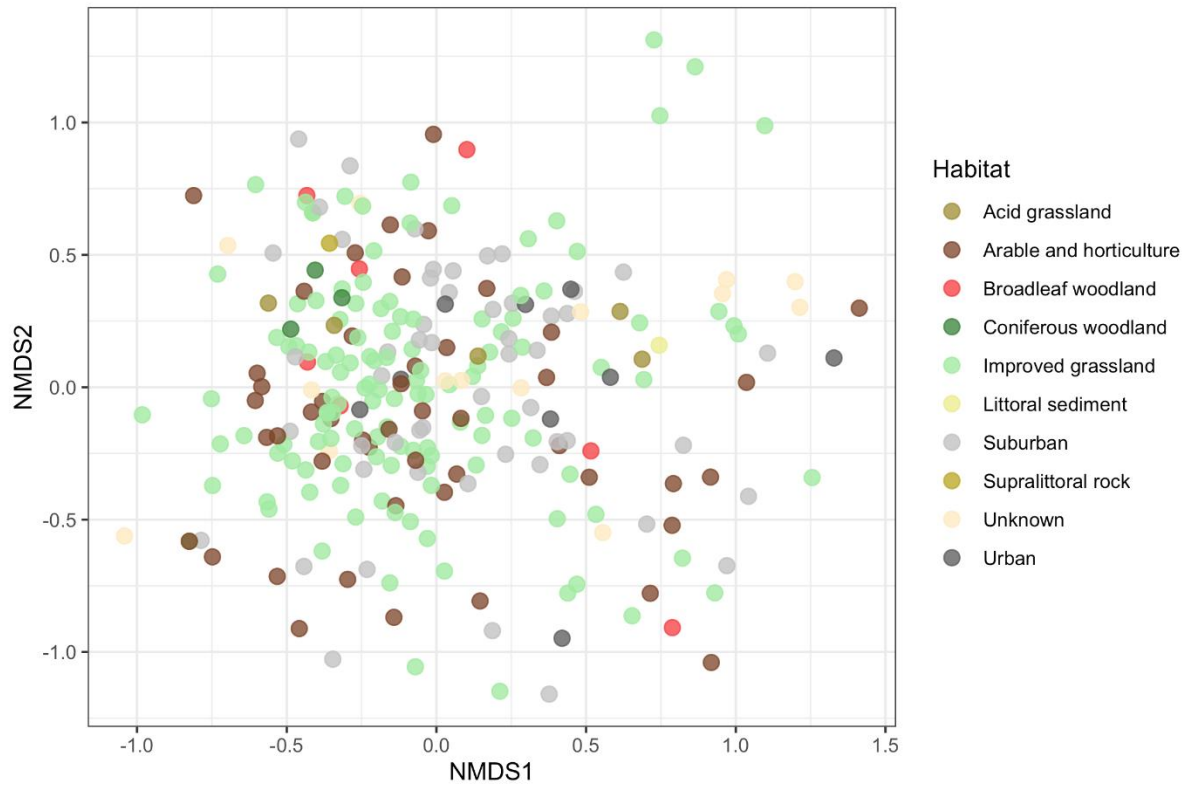

**Supplementary Figure 2:** Non-metric multidimensional scaling (NMDS) ordination of the 2017 honey samples collected in July and August. Colour indicates the dominant surrounding habitat measured within a 2 km radius of the hive location.

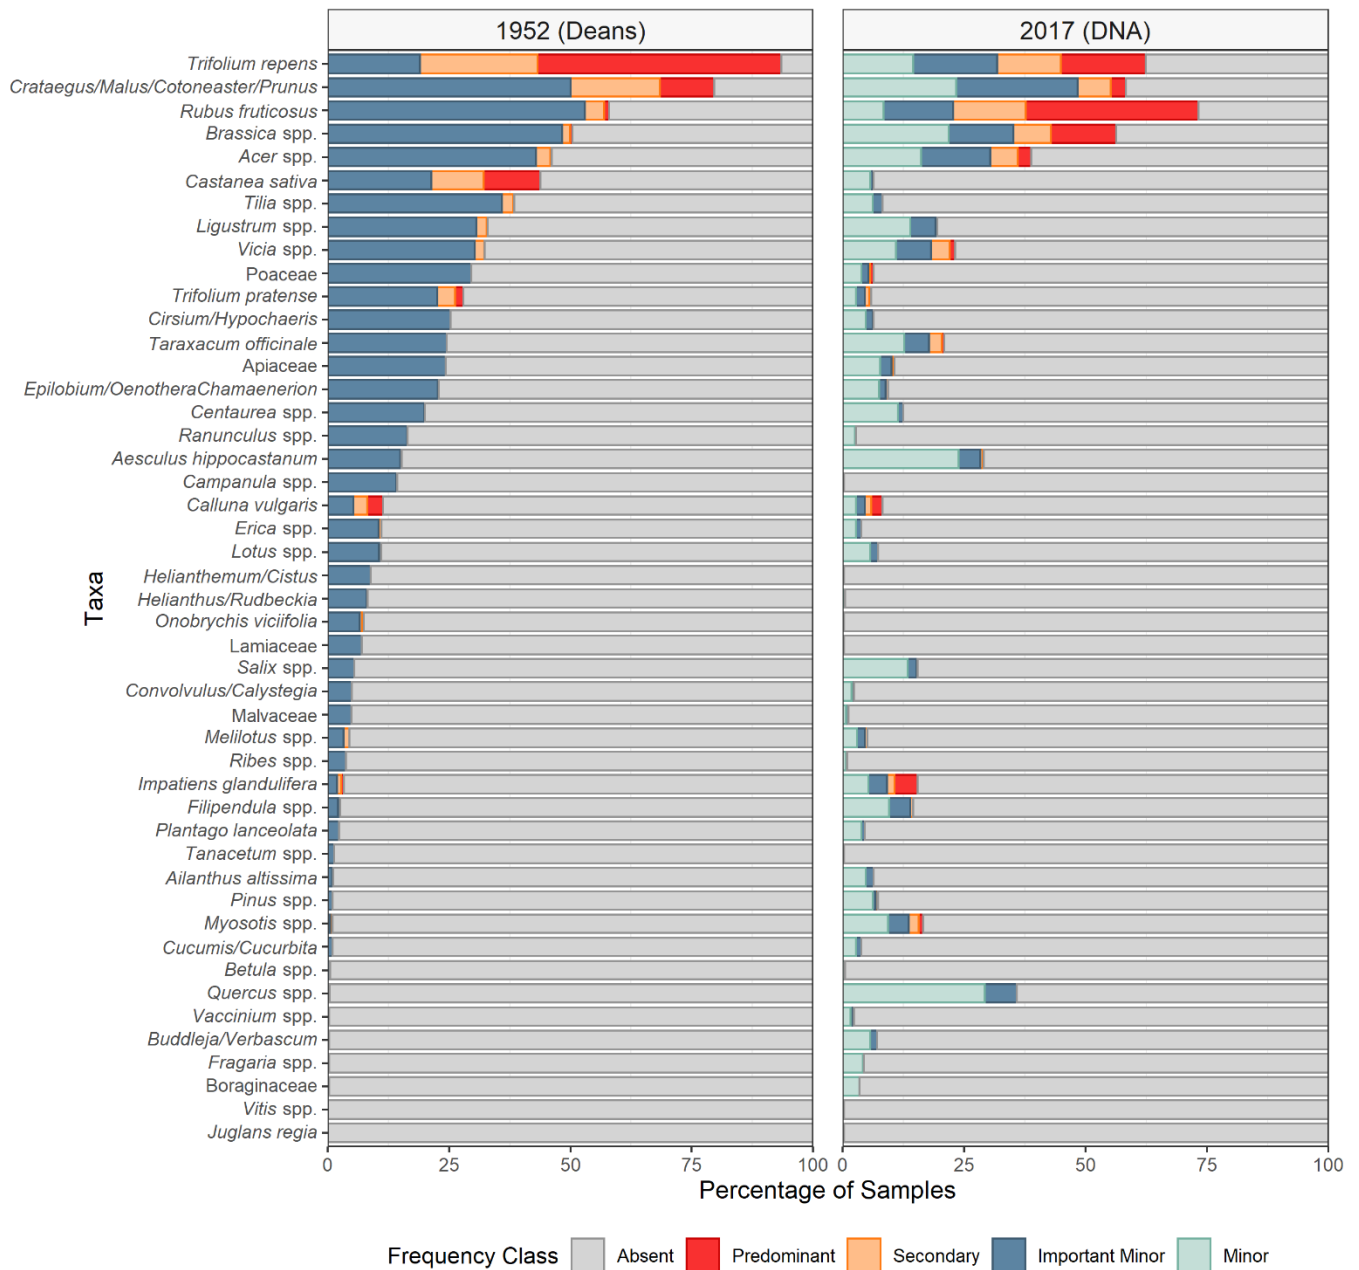

**Supplementary Figure 3:** Comparing 47 taxa in honey samples analysed by Deans in 1952 (n = 855), using melissopalynology, with honey samples analysed using DNA metabarcoding (n = 441). Overall, there was a positive correlation between the two honey surveys for the total percentage of samples found for each taxa (Kendall's  $\tau$  correlation coefficient,  $\tau = 0.389$ ,  $P = 0.0001$ ). In order to compare with the *Prunus*, *Pyrus*, *Crataegus* group identified by Deans, the DNA reads for the Maleae tribe and *Prunus* were grouped, to create the consensus group of *Crataegus*, *Malus*, *Cotoneaster*, and *Prunus*.

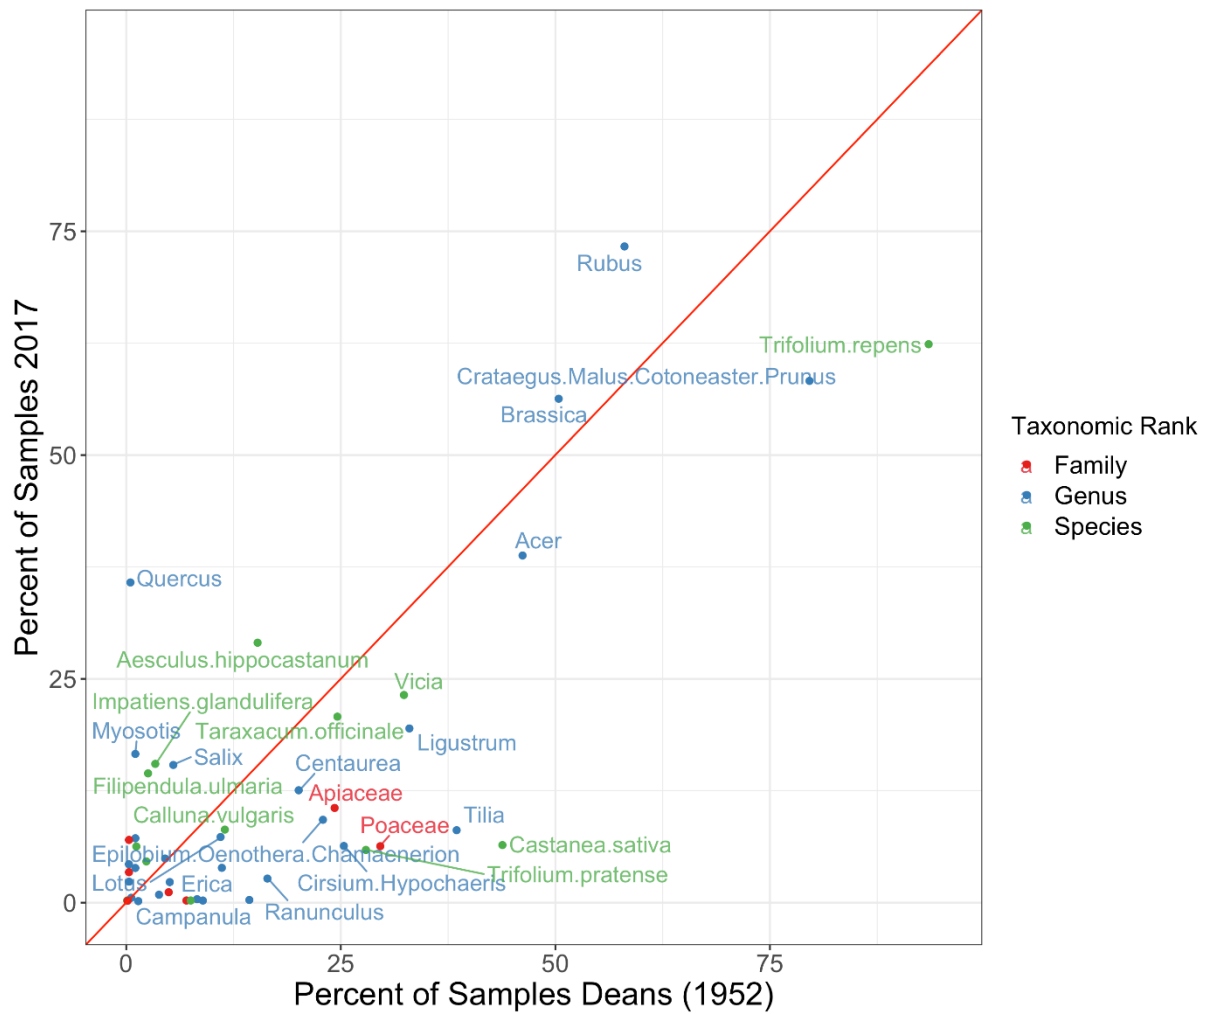

1

2 **Supplementary Figure 4:** Comparing the total proportion of samples found in 1952 and 2017 for the  
 3 plant taxa found in both surveys. There is a significant positive correlation (Kendall's  $\tau$  correlation  
 4 coefficient  $\tau = 0.389$ ,  $P < 0.001$ ). Taxa which appear in over 10% of samples for either the 1952 or  
 5 2017 survey are labelled.

6

7

8

9

10

11

12

13

14

15

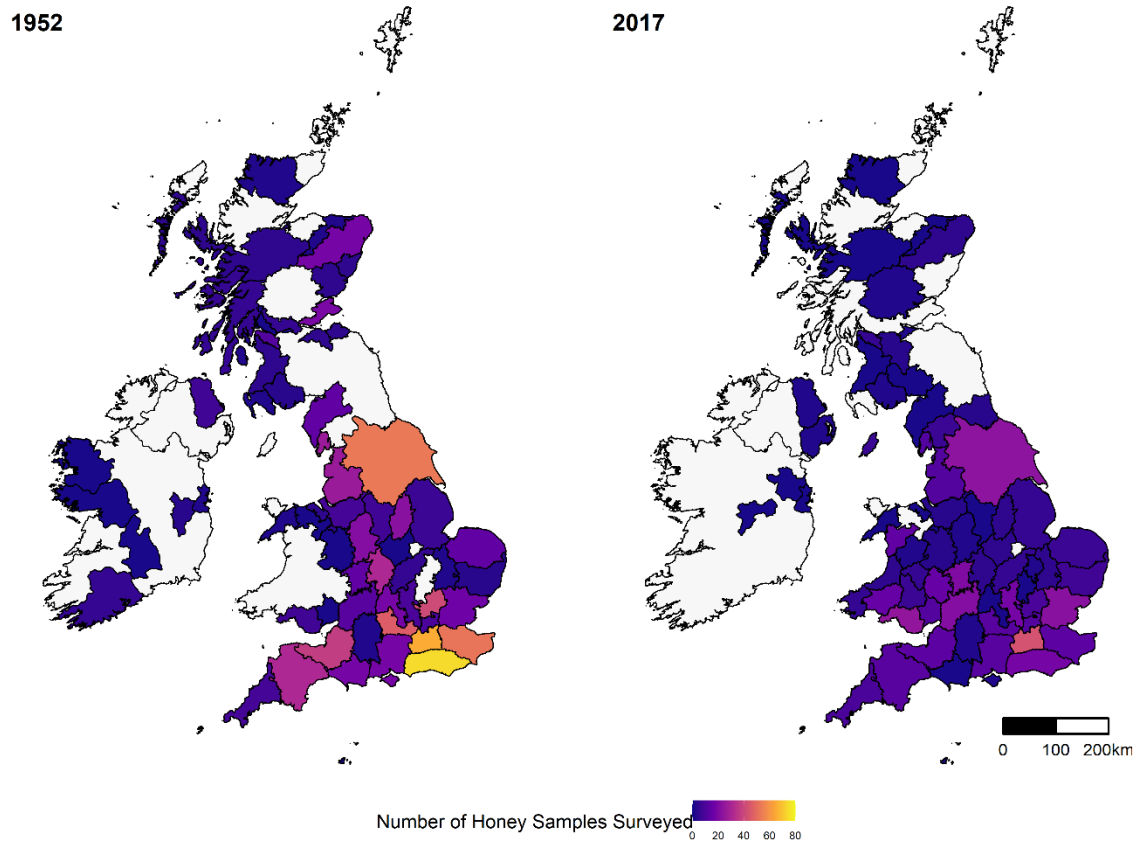

16

17 **Supplementary Figure 5:** A heat map showing the number of honey samples collected from each  
18 historical county within the UK and Ireland in 1952 (n = 855) and 2017 (n = 441).

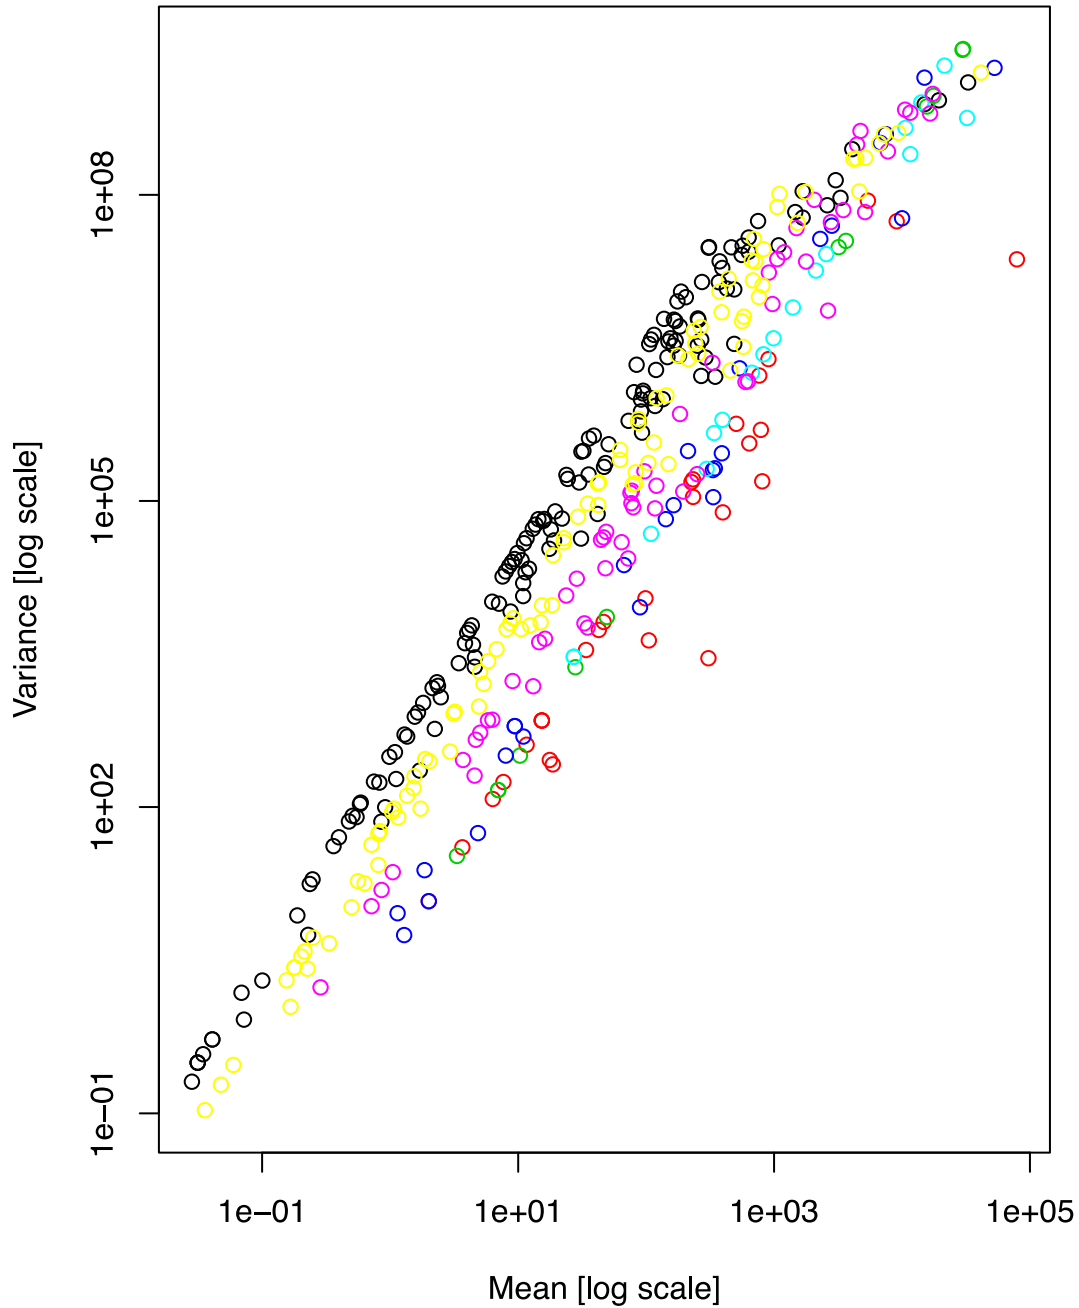

19

20 **Supplementary Figure 6.** There is a strong relationship between the mean proportion of DNA  
21 sequences and the variance of the proportion of DNA sequences from each sampling site. Coloured  
22 circles denote sampling region. The plots were produced using the `meanvar.plot` function in the  
23 'mvabund' package in R.

24

25

26

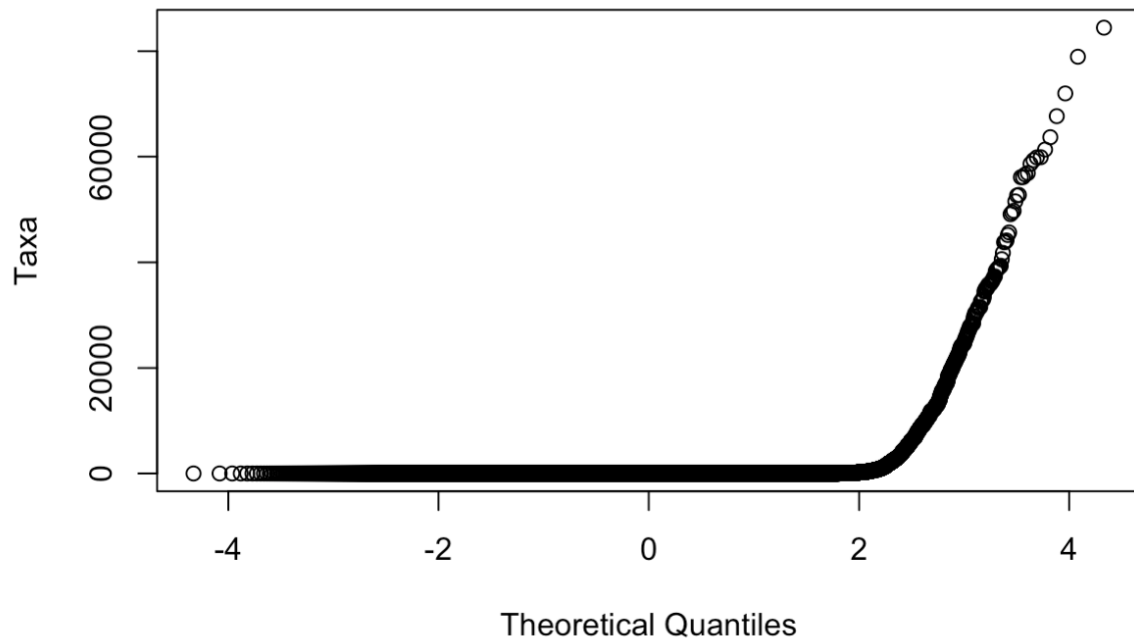

27

28 **Supplementary Figure 7.** Scatter plot of theoretical quantile values taken from a normal distribution  
29 and count data produced by metabarcoding (*rbcL* and ITS2 markers). Deviations from a straight line  
30 indicate that the count data do not have a normal distribution.

31

32

33

34

35

36

37

38

39

40



41

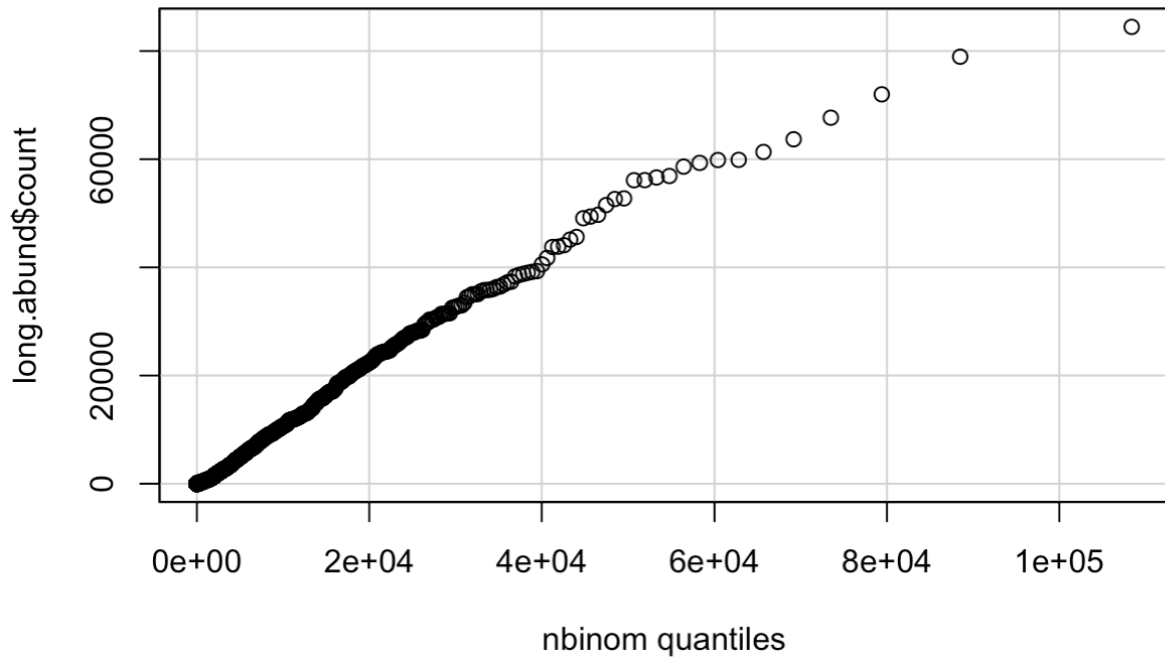

42

43 **Supplementary Figure 8.** Scatter plot of theoretical quantile values taken from a negative binomial  
44 distribution and count data produced by metabarcoding (*rbcL* and ITS2 markers). Deviations from the  
45 straight line are minimal indicating that the count data have a negative binomial distribution.

46

47

48

49

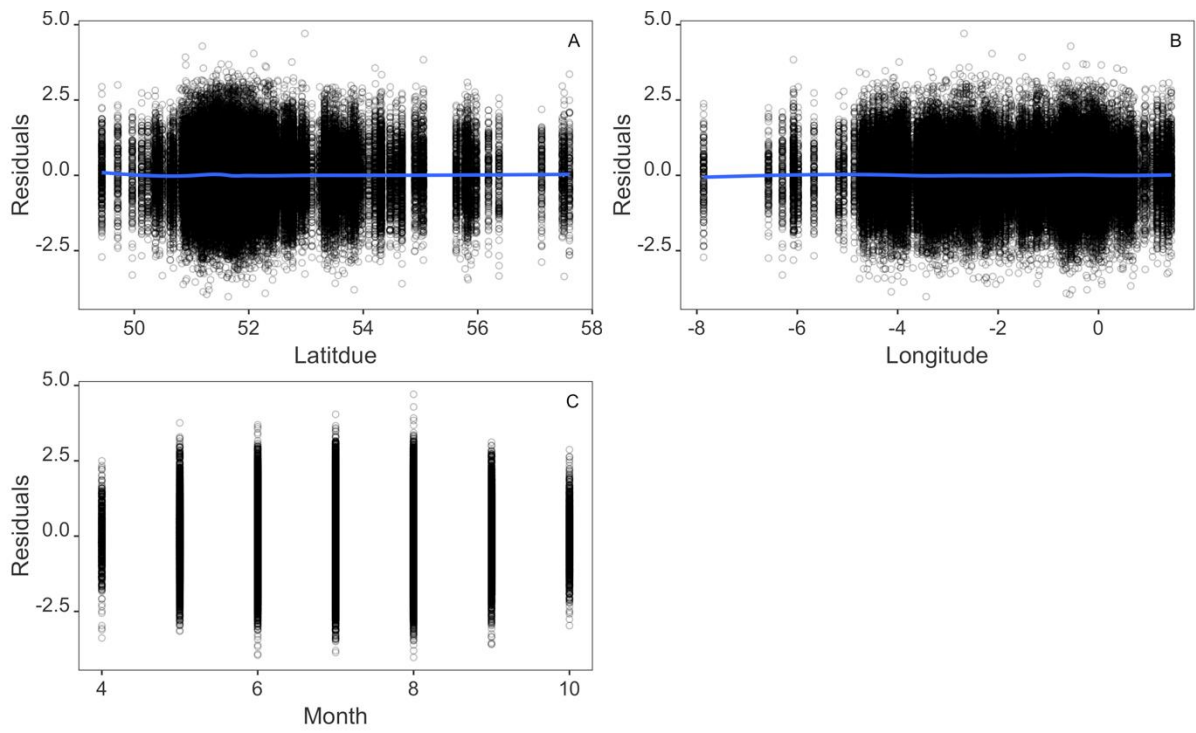

50

51 **Supplementary Figure 9.** Scatter plot of the residuals from the model used to analyse the  
 52 abundance data produced by metabarcoding (*rbcL* and ITS2 markers) and the model covariates A)  
 53 Latitude, B) Latitude and C) Time.

54

55

56

57

58

59

60

61

62

63

64

65

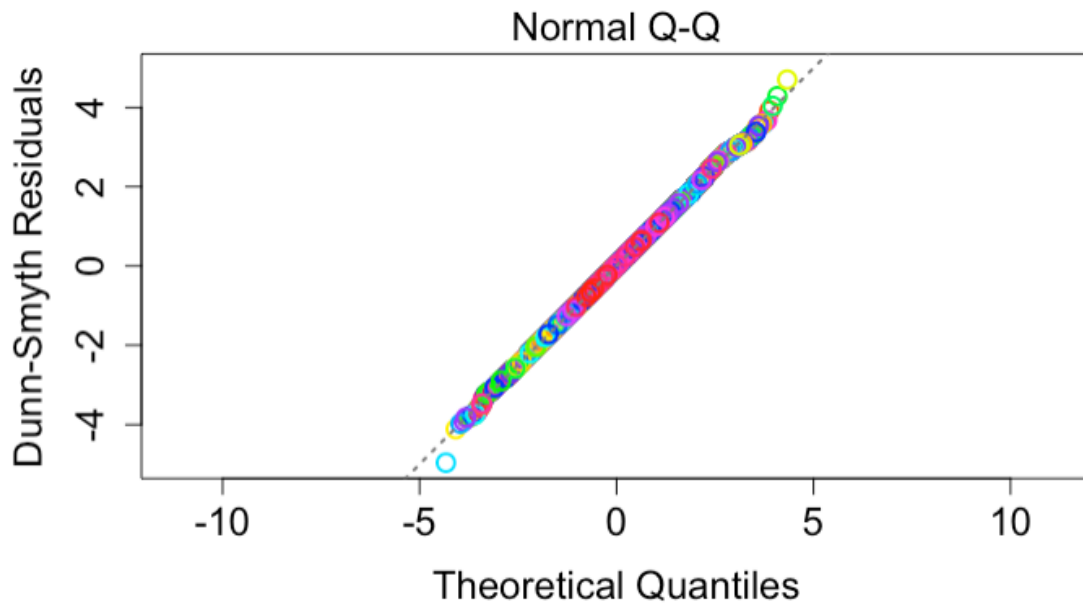

66

67 **Supplementary Figure 10.** Scatter plot of theoretical quantile values and the residuals output from  
68 the model used to analyse the abundance data produced by metabarcoding (*rbcL* and ITS2 markers).  
69 Deviations from the straight line are minimal indicating a normal distribution and suggests that the  
70 model selected is plausible and the mean-variance assumption of the negative binomial regression is  
71 correct. Coloured circles denote different genera in the abundance data. The plots were produced  
72 using the `plot.manyglm` function in the `mvabund` package in R.

73

74

75

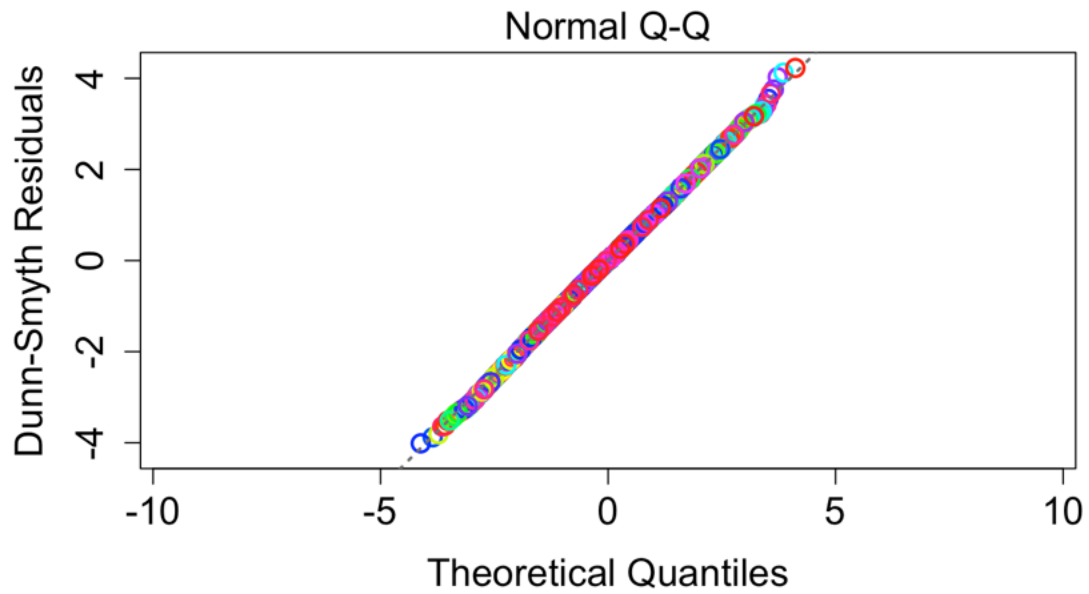

76

77 **Supplementary Figure 11.** Scatter plot of theoretical quantile values and the residuals output from  
78 the model used to analyse the abundance data produced by DNA metabarcoding (rbcL and ITS2  
79 markers) and melissopalynology. Deviations from the straight line are minimal indicating a normal  
80 distribution and suggests that the model selected is plausible. Coloured circles denote different  
81 genera in the abundance data. The plots were produced using the `plot.manyglm` function in the  
82 `mvabund` package in R.

83

84

85

86

87

88

89

90

91 **Supplementary Table 1. Relationship between the presence or absence of insect attractive**  
 92 **crop species around the hive and their presence in the honey.**

| Abundance Class (Percentage of sequencing reads) | <i>Brassica</i> spp. with <i>Brassica napus</i> present | <i>Brassica</i> spp. with <i>Brassica napus</i> absent | <i>Vicia</i> spp. with <i>Vicia faba</i> present | <i>Vicia</i> spp. with <i>Vicia faba</i> absent |
|--------------------------------------------------|---------------------------------------------------------|--------------------------------------------------------|--------------------------------------------------|-------------------------------------------------|
| Predominant (>45%)                               | 37                                                      | 22                                                     | 5                                                | 0                                               |
| Secondary (15-45%)                               | 25                                                      | 8                                                      | 12                                               | 5                                               |
| Important Minor (1-15%)                          | 28                                                      | 28                                                     | 22                                               | 10                                              |
| Minor (<1%)                                      | 36                                                      | 58                                                     | 33                                               | 14                                              |
| Absent                                           | 44                                                      | 138                                                    | 101                                              | 222                                             |

93  
 94 The frequency of *Brassica* spp. and *Vicia* spp. found in the 2017 honey samples when their respective  
 95 crop species, *Brassica napus* and *Vicia faba* were present or absent in a 2 km radius of the hive  
 96 location. Predominant: >45% of sequences returned in a sample, secondary: 15-45%, important  
 97 minor: 1-15% and minor <1%.

98

99

100

101

102

103

104

105

106

107

108

109

## 110 **Supplementary Results**

111 To explore the impact of rarefying the sequencing data to normalise the libraries, the  
112 sequencing sampling depth per sample was standardised by using the  
113 *rarefy\_even\_depth* function in the R package phyloseq. The 15<sup>th</sup> percentile for library  
114 size was chosen ( $n = 8012$ ) and set as the minimum library size, this removed 66  
115 samples from analysis, leaving 375 samples. All of the statistical analyses present in  
116 the paper were completed again to examine the conclusions.

117 The significant relationship between the frequency of the taxa found in both 2017  
118 and 1952 remained (Kendall's  $\tau$  correlation coefficient,  $\tau = 0.371$ ,  $P = 0.0004$ ). The  
119 differences between those plant taxa found abundantly within the honey samples in  
120 both surveys (>15% of DNA sequences or pollen grains within the sample) were then  
121 examined. The same patterns of increases and decreases in frequency across the  
122 honey samples were seen for the nine taxa as presented. All of the statistically  
123 significant changes in frequency remained, with the exception of one plant, *Acer*.  
124 ( $\chi^2 = 6.853$ , d.f. = 1,  $P = 0.178$ ).

125 The spatial relationship between the presence of *Brassica* and *Vicia* crop species in  
126 the landscape with their presence in the honey also remained the same. Apiaries  
127 with the related crop species present in a 2 km radius of the hives were more likely  
128 to have the crop present in the honey for both *Brassica* spp. and oilseed rape  
129 (*Brassica napus*) ( $\chi^2 = 45.52$ , d.f. = 4,  $P < 0.0001$ ) and *Vicia* spp. with field beans  
130 (*Vicia faba*) ( $\chi^2 = 48.13$ , d.f. = 4,  $P < 0.0001$ ).

131 The conclusions from the model examining the effects of time and location were  
132 unchanged, with calendar month (April-October) being a good predictor of plant taxa  
133 composition (Fig. 2;  $LR_{364, 1} = 427.3$ ,  $P = 0.001$ ). There were no overall regional

134 differences between England, Scotland and Wales (Supplementary Fig. 1; Latitude  
135  $LR_{363, 1} = 229.8$ ,  $P = 0.458$ ; Longitude  $LR_{362, 1} = 324.8$ ,  $P = 0.195$ ).

### 136 **Supplementary Discussion**

137 The results of the honey analysis conducted in 1952<sup>1,2</sup> are supported by other  
138 contemporary sources. In England, pollen loads were analysed through the 1945  
139 and 1946 season, with *Trifolium repens* and *Trifolium pratense* identified as the top  
140 species found overall<sup>3</sup>, while in South Wales *T. repens* and *Rubus fruticosus* were  
141 top in pollen loads collected from hives<sup>4</sup>. There were 19 taxa identified in 1952 but  
142 not in 2017; nine taxa could not be directly matched to results in the DNA due to  
143 differences in taxonomic resolution. For example, in 1952, some of the Asteraceae  
144 genera identified (*Tussilago* spp., *Achillea* spp.) may be represented under the family  
145 level Asteraceae identification in the DNA. The remaining ten taxa were not  
146 represented in the DNA, e.g. *Saxifraga* spp. The taxa missed using the DNA are  
147 known to be detected with these primer regions<sup>5,6</sup> and could be explained by the low  
148 levels at which they were found in 1952. In 2017, there were an additional 99 taxa  
149 not found in 1952 with 15 of these taxa occurring in more than 5% of samples.  
150 Similarly, the majority of these taxa were rarely identified at a predominant and  
151 secondary abundance (<1%), with the notable exception of *Ulex* spp. (predominant  
152 and secondary in 4% of samples). Contemporary sources identify *Ulex* spp. in  
153 honeybee pollen loads<sup>3,4</sup>, suggesting that this genus was likely missed by Deans<sup>1,2</sup>.  
154 Of the 15 taxa found using DNA metabarcoding in over 5% of samples which were  
155 not identified by Deans, nine taxa were identified in the pollen loads by Syngé (1947)  
156 and Percival (1947). Deans did not report the plant species classed as minor (less  
157 than 1% of pollen grains), which affected the overall species list found, and in

158 addition, 44% of samples contained pollen at important minor levels that could not be  
159 identified.

### 160 **Supplementary References**

- 161 1. Deans, A. S. C. *Survey of British Honey Sources*. (Bee Research Association, 1957).
- 162 2. Deans, A. S. C. *The Pollen Analysis of some British Honeys*. (Thesis for the National  
163 Bee Diploma, 1958).
- 164 3. Synge, A. D. Pollen collection by honeybees (*Apis mellifera*). *J. Anim. Ecol.* **16**, 122–  
165 138 (1947).
- 166 4. Percival, M. Pollen collection by *Apis mellifera*. *New Phytol.* **46**, 142–165 (1947).
- 167 5. Lucas, A. *et al.* Floral resource partitioning by individuals within generalised hoverfly  
168 pollination networks revealed by DNA metabarcoding. *Sci. Rep.* **8**, (2018).
- 169 6. de Vere, N. *et al.* DNA Barcoding the Native Flowering Plants and Conifers of Wales.  
170 *PLoS One* **7**, e37945 (2012).

171

172

173

174

175

176
